# Supplementary material
Source: Copernicus journal article supplement (doi:10.5194/egusphere-2026-1137)
Supplement: Supplementary file 1 [file egusphere-2026-1137-supplement.pdf]

1 **From Surface processes to Marine Ice-Sheet Instability: The Collapse of the Barents–**  
2 **Kara Ice Sheet during the last deglaciation**

3 **V. van Aalderen<sup>1,2,3</sup>, S. Charbit<sup>1,2</sup>, A. Quiquet<sup>1,2</sup> and C. Dumas<sup>1,2</sup>**

4 <sup>1</sup>Laboratoire des Sciences du Climat et de l'Environnement (LSCE), CEA, CNRS, UVSQ, Université  
5 Paris-Saclay, Gif-sur-Yvette, France

6 <sup>2</sup>Institut Pierre-Simon Laplace (IPSL), Université Versailles Saint-Quentin, Guyancourt, France

7 <sup>3</sup>Institut des Géosciences de l'Environnement (IGE), Université Grenoble Alpes, CNRS, IRD, INRAE,  
8 Grenoble INP, Grenoble, France.

9 Corresponding author: Victor van Aalderen ([victor.van-aalderen@univ-grenoble-alpes.fr](mailto:victor.van-aalderen@univ-grenoble-alpes.fr))

10

11 Supplement

12 1. Figures

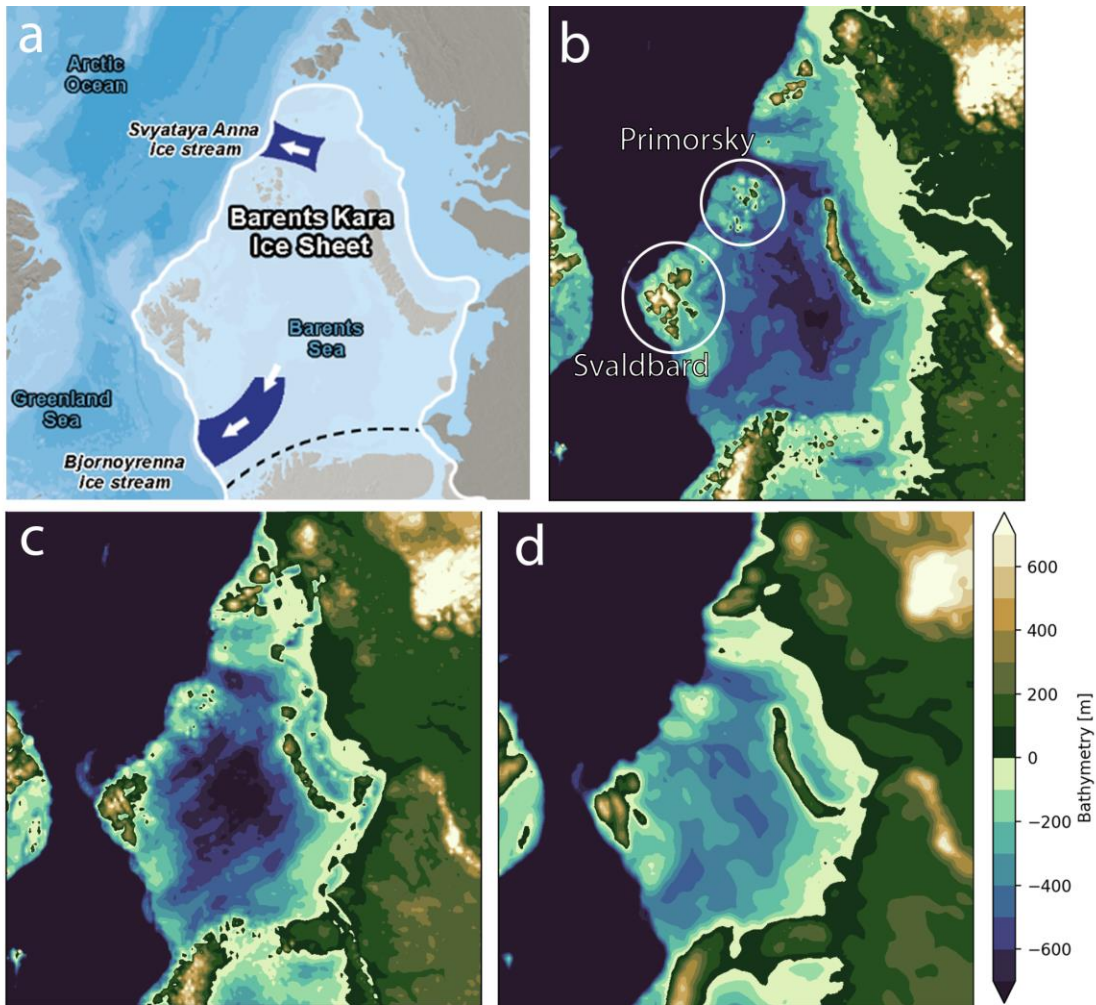

13  
14 **Figure S1:** a: Map of the Barents-Kara ice sheet at the LGM. The white line is the most credible ice extent  
15 of the Eurasian ice sheet at the LGM according to the DATED-1 compilation (Hughes et al., 2016). Dark  
16 blue areas correspond to the location of the main ice streams (Dowdeswell et al., 2016; Stokes and Clark,  
17 2001), and dotted black lines are delimitations between the Fennoscandian and the Barents-Kara ice  
18 sheets. b: Topography of BKIS at the LGM according to the DEGLA-MPI-iLOVECLIM-10 simulations. Blue  
19 areas are below the LGM sea level, while brown/green areas are above the LGM sea level. c. same as b,  
20 but for the ICE-6G\_C reconstruction. d. same as b, but for the GLAC1D reconstruction. For both c and d, the  
21 LGM topography was calculated by computing the topographic anomaly between the LGM and the pre-  
22 industrial period from the respective reconstructions and adding it to present-day observations to achieve  
23 a higher spatial resolution.

24  
25  
26

27 We performed 15 equilibrium simulations by using the LGM climate simulated with 5 different  
 28 PMIP3/PMIP4 experiments to generate ice sheets in good agreement with geological  
 29 reconstructions. To explore the impact of basal stress we ran simulations with three different  
 30 values for the minimum basal friction, setting  $\beta_{min}$  to 10, 50, or 100 Pa.s.m<sup>-1</sup>.

31  
 32 Figure S2 shows the total volume of the BKIS ice sheet at the end of the 100,000-year simulations  
 33 for different GCM forcins abd different  $\beta_{min}$  values. Our results indicate that higher  $\beta_{min}$  values  
 34 lead to an overestimation of ice volume compared to the GLAC1D and ICE-6G\_C reconstructions  
 35 (Add references here for both reconstructions). A lower basal friction allows ice streams to flow  
 36 more rapidly, making it more difficult to sustain thick ice upstream, as ice is transported away  
 37 more efficiently. Consequently, simulations with  $\beta_{min} = 10$  Pa.s.m<sup>-1</sup> produce lower ice volumes  
 38 that better match with reconstructions compared to higher  $\beta_{min}$  values.

39  
 40 However,  $\beta_{min}$  has no significant influence on the simulated ice sheet extent (see Figs. S2 and  
 41 S3). This can be explained by the fact that the northern boundaries of BKIS are constrained by  
 42 the edge of the continental shelf, making it difficult for ice to form in deeper waters, and by  
 43 temperatures above the melting point in the continental part of BKIS (Siberia and Northern  
 44 Europe).

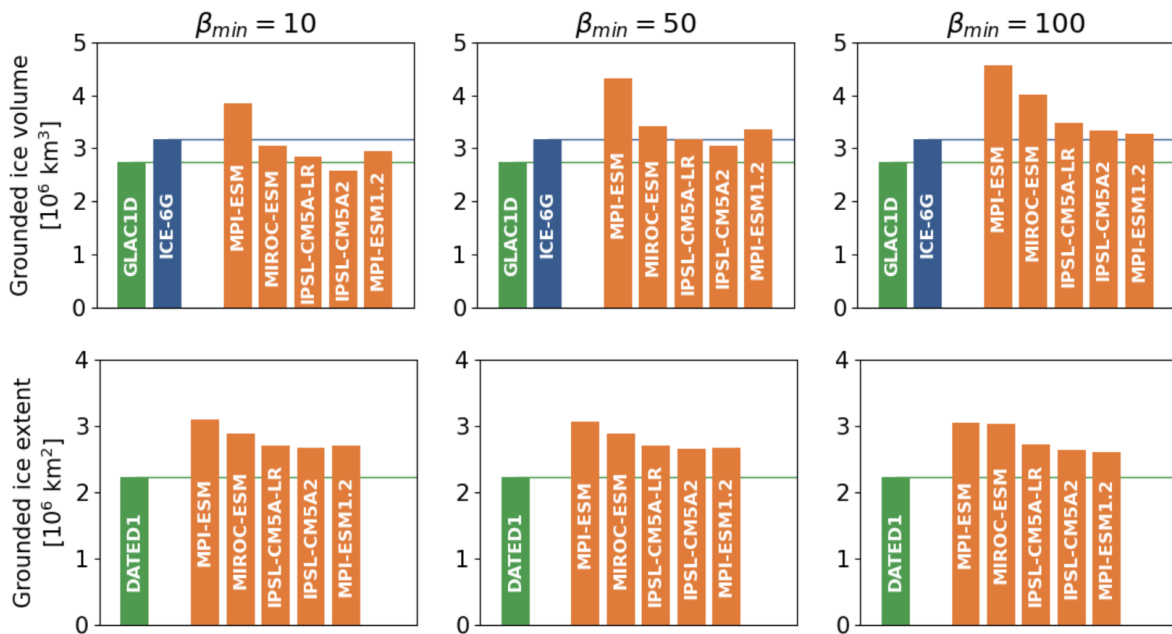

45 **Figure S2:** up: Ice volume simulated at the end of the 100.000 years of spin up simulations for different  
 46 values of  $\beta_{min}$  compared to reconstructions. down: same as up but for ice extent.

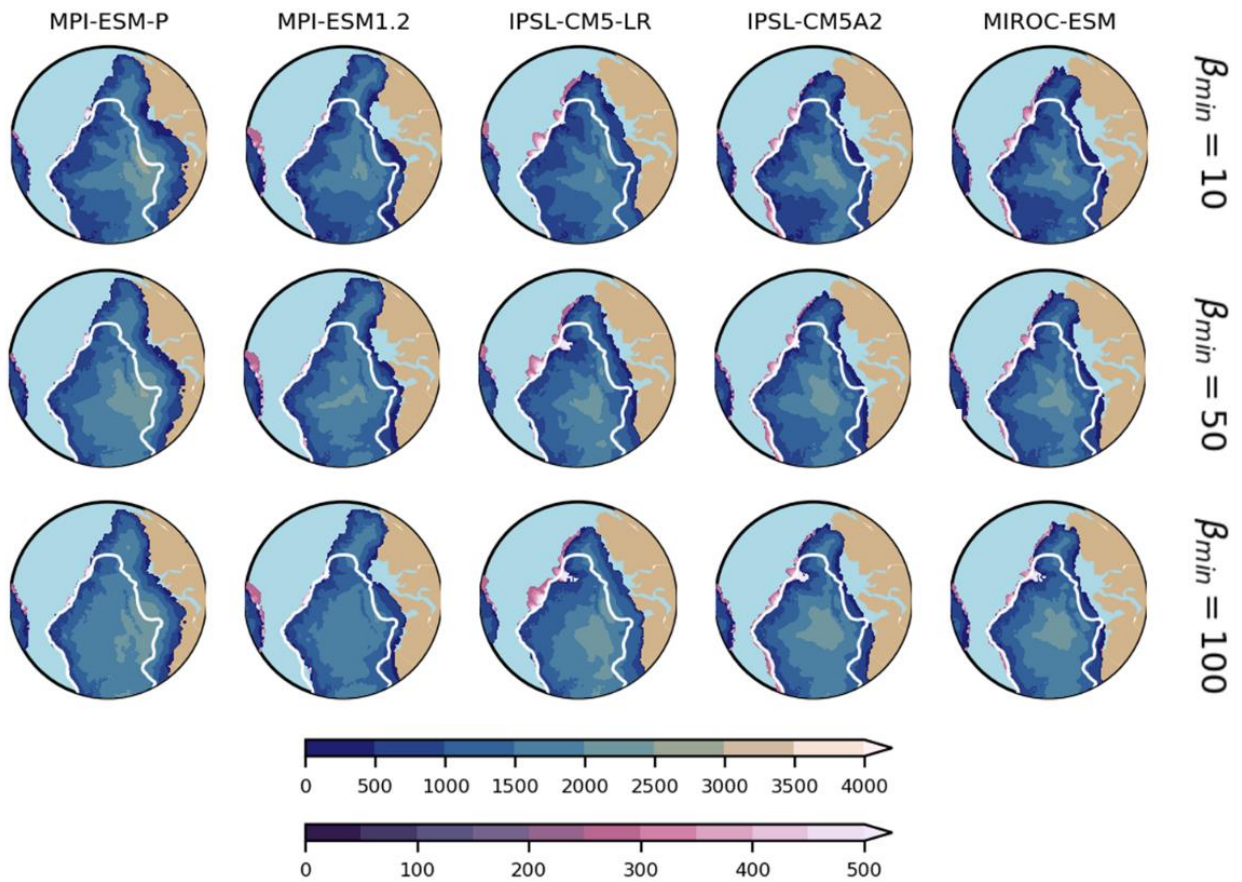

49 **Figure S3:** Initial ice thickness, in meter, of grounded ice (in blue) and ice shelves (in pink) for different  
 50 values of  $\beta_{min}$ . The white line shows the DATED1 ice extent at the LGM.  
 51

52  
 53

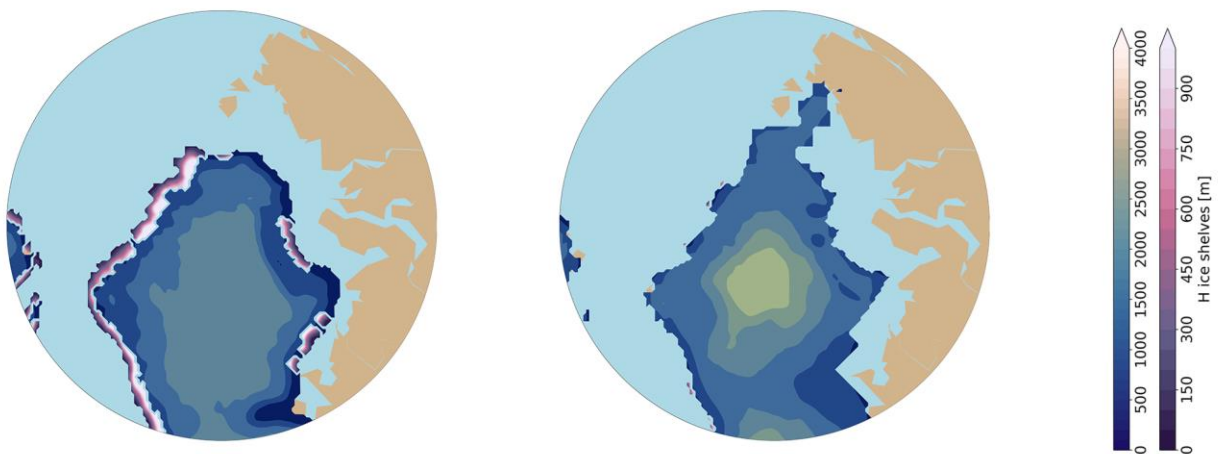

54 **Figure S4:** Ice thickness, in meter, of grounded ice (in blue) and ice shelves (in pink) at the LGM for GLAC1D  
 55 (left) and ICE\_6G (right) reconstructions  
 56

57  
 58

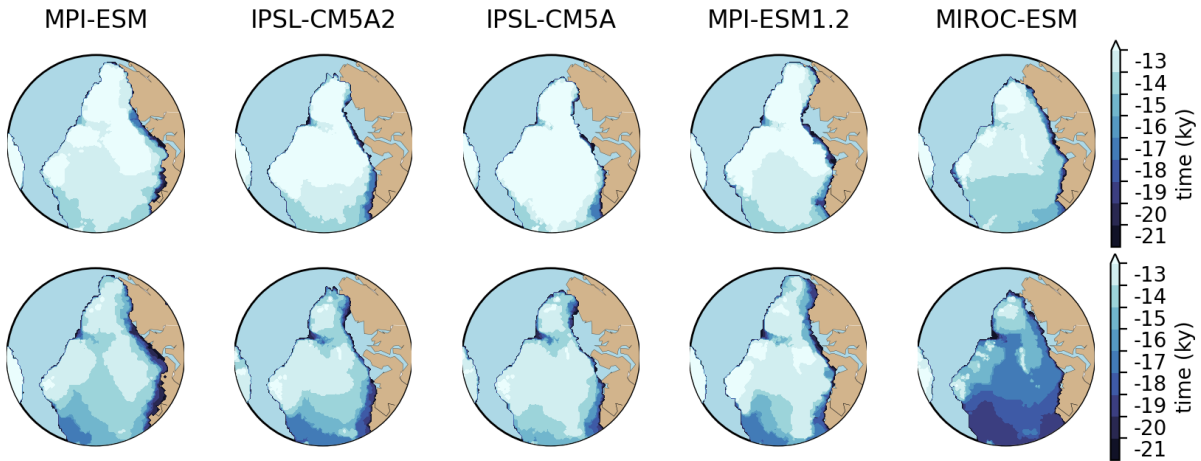

59  
 60 **FigureS5:** Date at which deglaciation is completed for each of the GRISLI reference simulations ( $\beta_{min} =$   
 61  $10 \text{ Pa}\cdot\text{s}\cdot\text{m}^{-1}$ ) forced by the five PMIP3/PMIP4 models and using the two climate indexes calculated from  
 62 the TRACE21k (top) and iLOVECLIM (bottom) simulations.

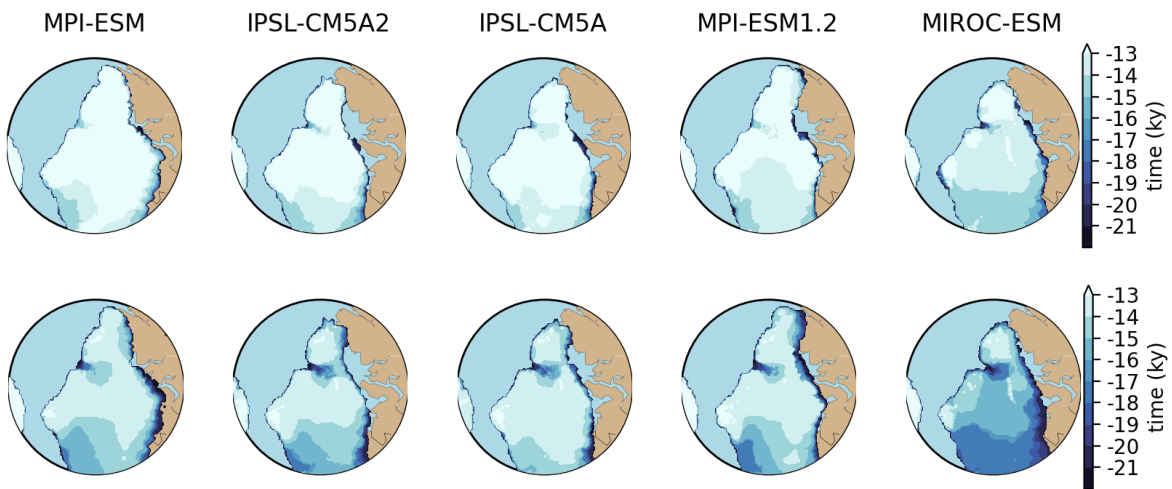

64  
 65 **FigureS6:** Same as figure S5 but for  $\beta_{min} = 50 \text{ Pa s m}^{-1}$ .

66  
 67  
 68  
 69  
 70  
 71

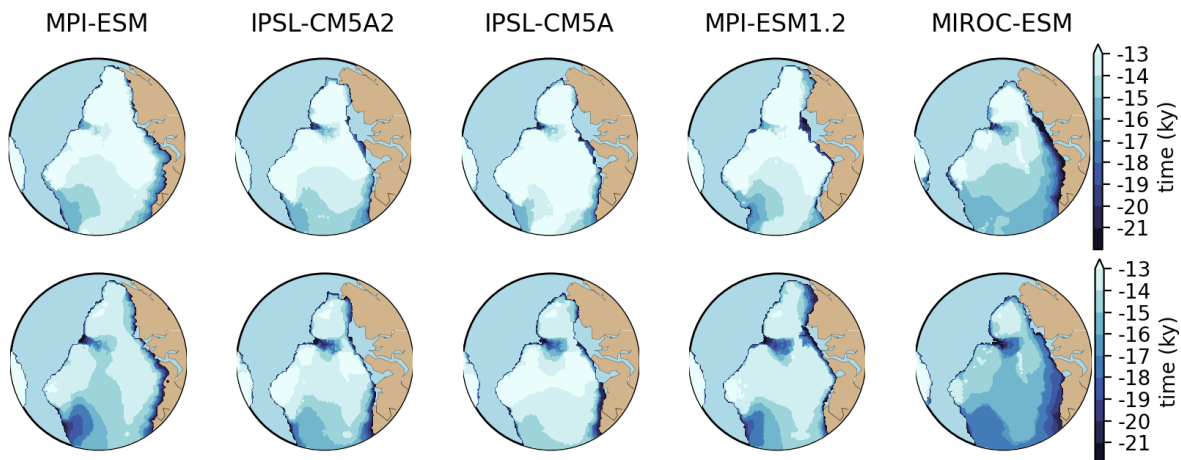

72  
73  
74  
75  
76  
77  
78

**Figure S7:** Same as figure S5 but for  $\beta_{min} = 100 \text{ Pa s m}^{-1}$ .

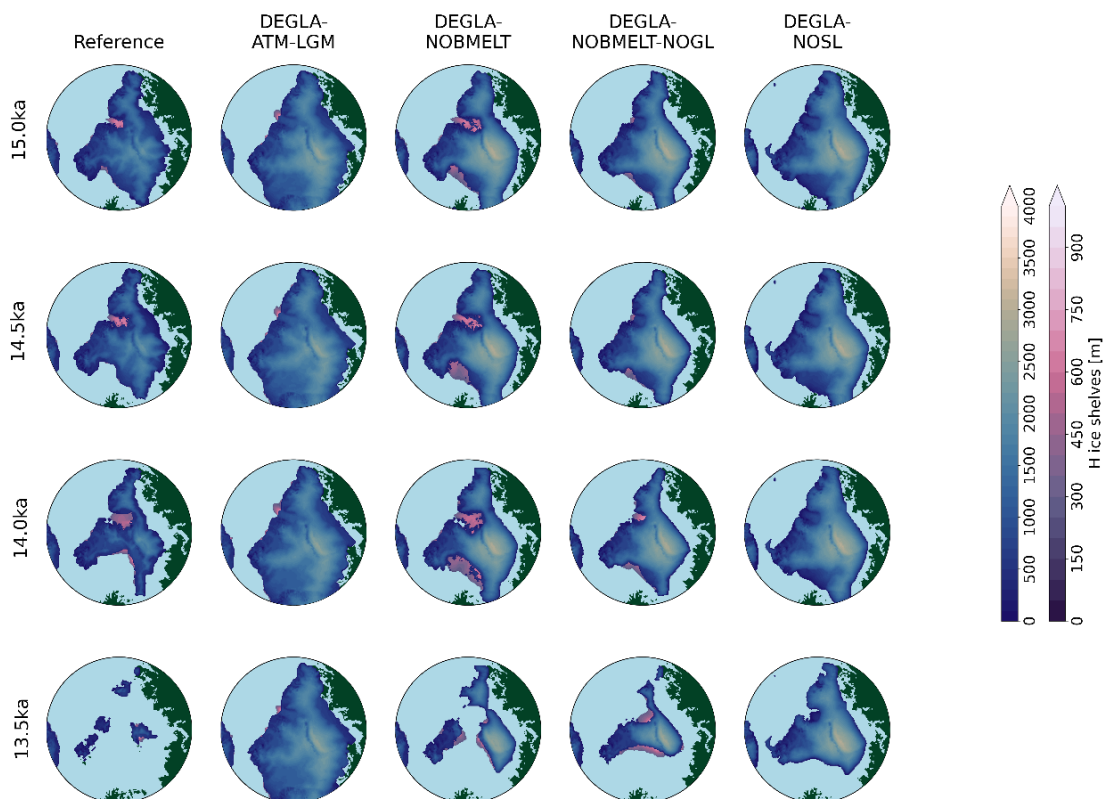

79

80 **Figure S8:** Ice thickness (in meters) of grounded ice (blue shaded areas) and ice shelves (pink shaded  
81 areas) at different time steps using the iLOVECLIM index, the MPI-ESM forcing and  $\beta_{min} = 10 \text{ Pa.s.m}^{-1}$  for

82 the reference (a), b: the DEGLA-ATM-LGM; c: DEGLA-NOBMELT; d: DEGLA-NOBMELT-NOGL and e: DEGLA-  
83 NOSL.

---

84  
85

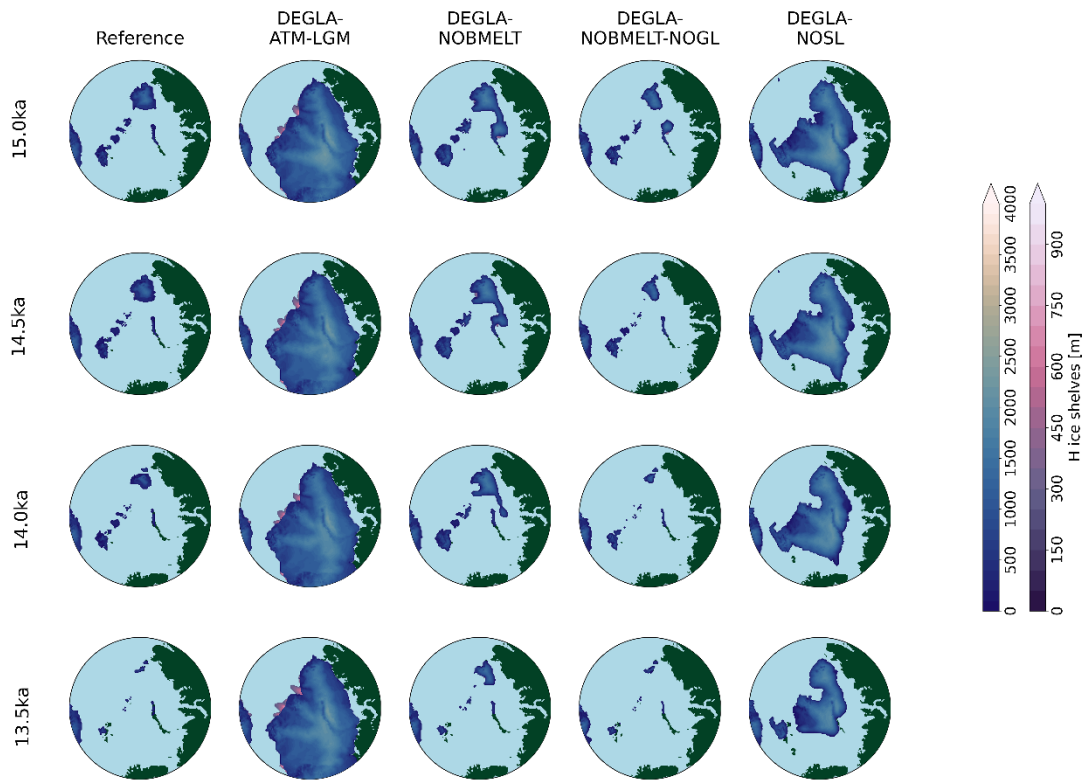

86

87 **Figure S9:** same as Figure S8 but for simulations forced by MIROC

---

88

89

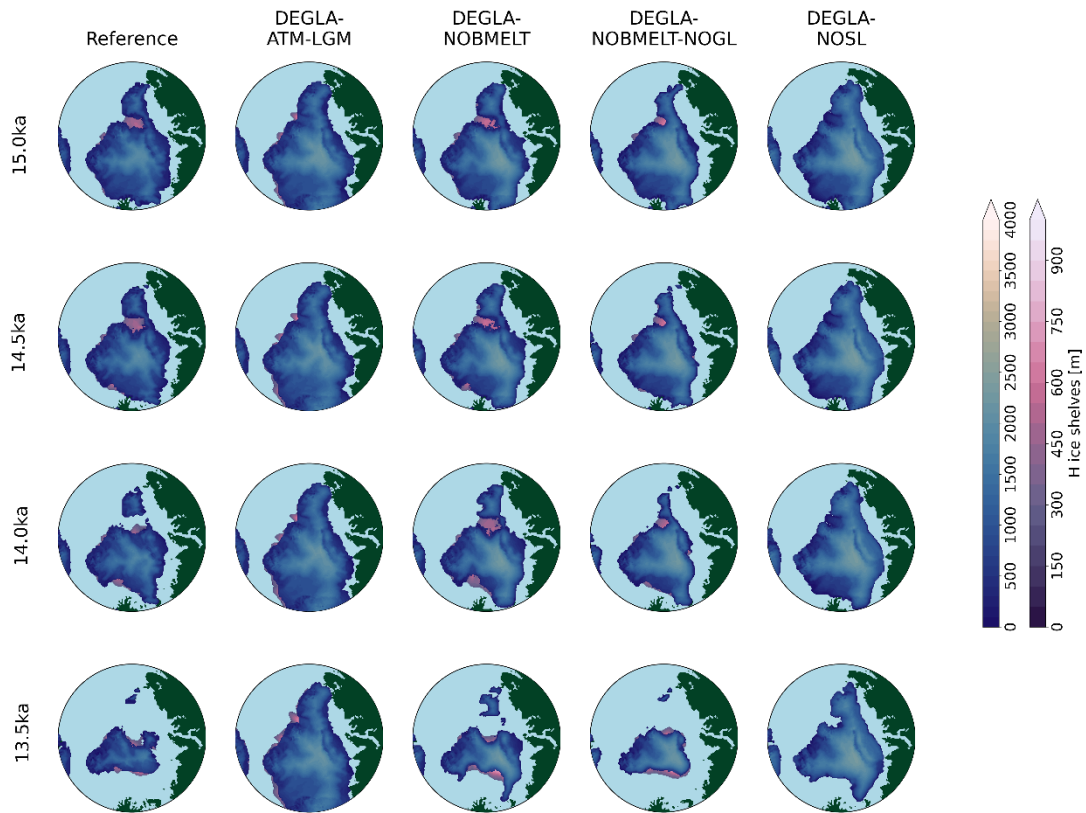

90

91 **Figure S10:** same as Figure S8 but for simulations forced by IPSLCM5LR

92

93

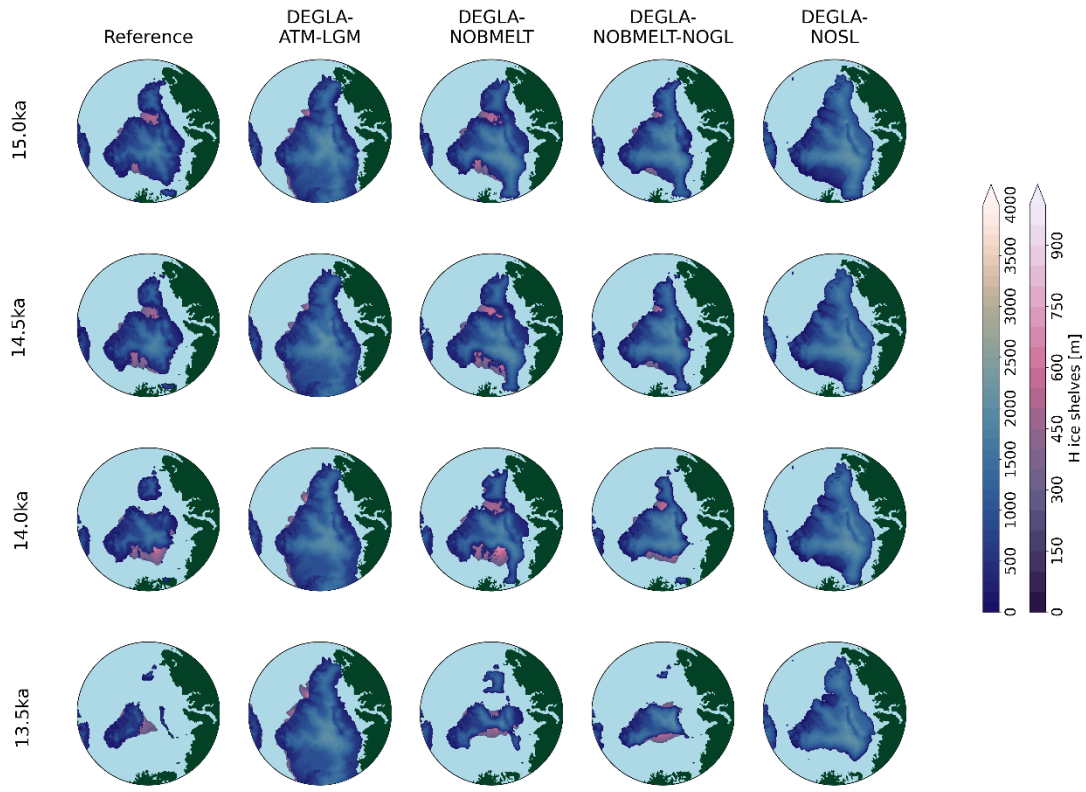

94

95 **Figure S11:** same as Figure S8 but for simulations forced by IPSLCM5A2

96

97

98

99

100

101

102

103

104

105

106

107

108

109

110

111

112

113

114

115 To highlight the limited role of ocean warming, a new set of experiments was conducted (DEGLA-  
116 ATM-LGM-+10C). As in DEGLA-ATM-LGM, atmospheric temperatures were kept fixed at their  
117 LGM values. In this experiment, 3D ocean temperatures were artificially increased by +10°C  
118 relative to their LGM values. This increase was applied on top of the temporal evolution  
119 prescribed by the climate index. Figure S12 shows that, even under these conditions, no  
120 significant retreat of the BKIS ice sheet is simulated.

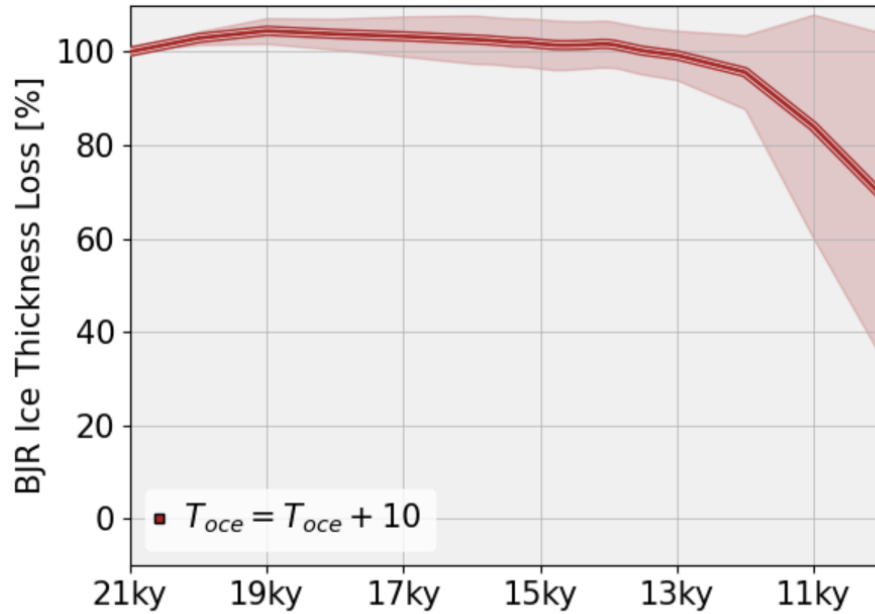

121 **Figure S12:** Multi-model mean of ice thickness loss in the Bjornoyrenna (BJR) region relative to the LGM  
122 ice sheet for the  $T_{ocean}+10$  experiment, using the iLOVECLIM index. Values of 0% indicate complete ice  
123 loss. The y-axis represents ice volume loss relative to the initial ice volume.  
124

125  
126  
127  
128  
129  
130  
131  
132  
133  
134  
135

136

137 **2. Tables**138 **Table S1:** Model parameters of the GRISLI ice-sheet model used in this study

| Parameters                                    | Identifier name | Value                                             |
|-----------------------------------------------|-----------------|---------------------------------------------------|
| Enhancement factor (SIA)                      | $E_{SIA}$       | 5                                                 |
| Enhancement factor (SSA)                      | $E_{SSA}$       | 0.625                                             |
| Atmospheric temperature lapse rate            | $\lambda$       | $7 \text{ }^\circ\text{C km}^{-1}$                |
| Precipitation ratio to temperature change     | $\omega$        | $0.11 \text{ }^\circ\text{C}^{-1}$                |
| Oceanic heat transfer factor                  | $K_t$           | $7 \text{ m yr}^{-1} \text{ }^\circ\text{C}^{-1}$ |
| Thickness threshold for the calving criterion | $H_{cut}$       | 250 m                                             |
| Relaxation time of the asthenosphere          | $R_{time}$      | 3000 years                                        |
| Basal drag parameter                          | $C_f$           | $1.5 \text{ } 10^{-6} \text{ m yr}^{-1}$          |

139

140 **Table S2:** Parameterisations of the GRISLI ice-sheet model used in this study

| Parameterisations               | References                       |
|---------------------------------|----------------------------------|
| Positive degree-days            | Tarasov and Peltier (2002)       |
| Basal melting below ice shelves | Deconto and Pollard (2012)       |
| Flux at the grounding line      | Tsai et al. (2015)               |
| Basal friction law              | Budd law / Brondex et al. (2017) |

141

142

143 **Table S3:** PMIP3 and PMIP4 models used to force GRISLI. The fourth column indicates the choice of the ice sheet  
144 boundary condition at the LGM for each GCM simulation.

| model        | References              | PMIP/CMIP   | Boundary condition |
|--------------|-------------------------|-------------|--------------------|
| MPI-ESM-P    | Adloff et al. (2018)    | CMIP5 PMIP3 | PMIP3 ice sheet    |
| MIROC-ESM    | Sueyoshi et al. (2013)  | CMIP5 PMIP3 | PMIP3 ice sheet    |
| IPSL-CM5A-LR | Dufresne et al. (2013)  | CMIP5 PMIP3 | PMIP3 ice sheet    |
| IPSL-CM5A2   | Sepulchre et al. (2020) | CMIP6 PMIP4 | ICE-6G_C           |
| MPI-ESM1.2   | Mauritsen et al. (2019) | CMIP6 PMIP4 | ICE-6G_C           |

145

146 **Table S4:** List of the different reference deglaciation experiments conducted with the GRISLI ice sheet  
 147 model: Experiment names (1st column), climate forcing (2nd column), climate index used to establish an  
 148 evolving climatology and force GRISLI between the LGM and the pre-industrial period (3rd column) and  
 149  $\beta_{min}$  value (4th column).

| Experiment names             | Climate forcing | Climate index | $\beta_{min}$ |
|------------------------------|-----------------|---------------|---------------|
| DEGLA-MPI-iLOVECLIM-10       | MPI-ESM-P       | iLOVECLIM     | 10            |
| DEGLA-MPI-TRACE21k-10        | MPI-ESM-P       | TRACE21k      | 10            |
| DEGLA-MPI1.2-iLOVECLIM-10    | MPI-ESM1.2      | iLOVECLIM     | 10            |
| DEGLA-MPI1.2-TRACE21k-10     | MPI-ESM1.2      | TRACE21k      | 10            |
| DEGLA-MIROC-iLOVECLIM-10     | MIROC-ESM       | iLOVECLIM     | 10            |
| DEGLA-MIROC-TRACE21k-10      | MIROC-ESM       | TRACE21k      | 10            |
| DEGLA-IPSLCM5LR-iLOVECLIM-10 | IPSL-CM5A-LR    | iLOVECLIM     | 10            |
| DEGLA-IPSLCM5LR-TRACE21k-10  | IPSL-CM5A-LR    | TRACE21k      | 10            |
| DEGLA-IPSLCM5A2-iLOVECLIM-10 | IPSL-CM5A2      | iLOVECLIM     | 10            |
| DEGLA-IPSLCM5A2-TRACE21k-10  | IPSL-CM5A2      | TRACE21k      | 10            |

150

| Experiment names             | Climate forcing | Climate index | $\beta_{min}$ |
|------------------------------|-----------------|---------------|---------------|
| DEGLA-MPI-iLOVECLIM-50       | MPI-ESM-P       | iLOVECLIM     | 50            |
| DEGLA-MPI-TRACE21k-50        | MPI-ESM-P       | TRACE21k      | 50            |
| DEGLA-MPI1.2-iLOVECLIM-50    | MPI-ESM1.2      | iLOVECLIM     | 50            |
| DEGLA-MPI1.2-TRACE21k-50     | MPI-ESM1.2      | TRACE21k      | 50            |
| DEGLA-MIROC-iLOVECLIM-50     | MIROC-ESM       | iLOVECLIM     | 50            |
| DEGLA-MIROC-TRACE21k-50      | MIROC-ESM       | TRACE21k      | 50            |
| DEGLA-IPSLCM5LR-iLOVECLIM-50 | IPSL-CM5A-LR    | iLOVECLIM     | 50            |
| DEGLA-IPSLCM5LR-TRACE21k-50  | IPSL-CM5A-LR    | TRACE21k      | 50            |
| DEGLA-IPSLCM5A2-iLOVECLIM-50 | IPSL-CM5A2      | iLOVECLIM     | 50            |
| DEGLA-IPSLCM5A2-TRACE21k-50  | IPSL-CM5A2      | TRACE21k      | 50            |

151

| Experiment names              | Climate forcing | Climate index | $\beta_{min}$ |
|-------------------------------|-----------------|---------------|---------------|
| DEGLA-MPI-iLOVECLIM-100       | MPI-ESM-P       | iLOVECLIM     | 100           |
| DEGLA-MPI-TRACE21k-100        | MPI-ESM-P       | TRACE21k      | 100           |
| DEGLA-MPI1.2-iLOVECLIM-100    | MPI-ESM1.2      | iLOVECLIM     | 100           |
| DEGLA-MPI1.2-TRACE21k-100     | MPI-ESM1.2      | TRACE21k      | 100           |
| DEGLA-MIROC-iLOVECLIM-100     | MIROC-ESM       | iLOVECLIM     | 100           |
| DEGLA-MIROC-TRACE21k-100      | MIROC-ESM       | TRACE21k      | 100           |
| DEGLA-IPSLCM5LR-iLOVECLIM-100 | IPSL-CM5A-LR    | iLOVECLIM     | 100           |
| DEGLA-IPSLCM5LR-TRACE21k-100  | IPSL-CM5A-LR    | TRACE21k      | 100           |
| DEGLA-IPSLCM5A2-iLOVECLIM-100 | IPSL-CM5A2      | iLOVECLIM     | 100           |
| DEGLA-IPSLCM5A2-TRACE21k-100  | IPSL-CM5A2      | TRACE21k      | 100           |

152
